# Supplementary material for: Revealing the diastereomeric nature of pincer terdentate nitrogen ligands 2,6-bis(arylaminomethyl)pyridine through coordination to palladium
Source: Royal Society of Chemistry journal article supplement (doi:10.1039/b201319c), 2002-01-01
Supplement: b201319c.doc [file b201319c.doc]

Revealing Diastereomeric Nature of Pincer Terdentate Nitrogen Ligands 2,6-bis(arylaminomethyl)pyridine through Coordination to Palladium

Ana Arnáiz,a José V. Cuevas,a Gabriel García-Herbosa*,a Arancha Carbayo,a Juan A. Casaresb and Enrique Gutierrez-Puebla.c

# ELECTRONIC SUPPLEMENTARY INFORMATION

*Input data for complex* ***2a*** *(DNMR program). Initial values.*

1,2,4,0,2,0,1

1571.28,1401.49

17.60

1499.35,1474.19

17.50

1401.49,1571.28

17.60

1474.19,1499.35

17.50

.333,.167,.333,.167

.098,.098,.098,.098

0.

0.

0.

0.

0.

0.

*Input data for complex* ***2c*** *(gNMR program).*

Molecule 1 (mayor isomer)

|  | Nucleus | |  |  | J(Hz) | | | |
| --- | --- | --- | --- | --- | --- | --- | --- | --- |
|  | Name | n | ∂(ppm) | w(Hz) | 1 | 2 | 3 | 4 |
| 1 | 1H | 1 | 5.311 | 2.97 |  |  |  |  |
| 2 | 1H | 1 | 4.983 | 2.90 | 17.01 |  |  |  |
| 3 | 1H | 1 | 5.311 | 2.97 | 0.00 | 0.00 |  |  |
| 4 | 1H | 1 | 4.983 | 2.90 | 0.00 | 0.00 | 17.01 |  |

**Molecule 2 (**minor isomer)

|  | Nucleus | |  |  | J(Hz) | | | |
| --- | --- | --- | --- | --- | --- | --- | --- | --- |
|  | Name | n | ∂(ppm) | w(Hz) | 1 | 2 | 3 | 4 |
| 1 | 1H | 1 | 5.356 | 2.98 |  |  |  |  |
| 2 | 1H | 1 | 5.111 | 2.60 | 17.03 |  |  |  |
| 3 | 1H | 1 | 5.356 | 2.98 | 0.00 | 0.00 |  |  |
| 4 | 1H | 1 | 5.111 | 2.60 | 0.00 | 0.00 | 17.03 |  |

Exchange

|  | P1 | P2 | P3 | P4 |
| --- | --- | --- | --- | --- |
| Rate | 0.1 | -1 | -1 | -1 |
| ITER? | Variable | Variable | Variable | Variable |
| 1-1 | 2-1 | 2-2 | 1-2 | 1-1 |
| 1-2 | 2-2 | 2-1 | 1-1 | 1-2 |
| 1-3 | 2-4 | 2-3 | 1-4 | 1-3 |
| 1-4 | 2-3 | 2-4 | 1-3 | 1-4 |
| 2-1 | 1-1 | 1-2 | 2-1 | 2-2 |
| 2-2 | 1-2 | 1-1 | 2-2 | 2-1 |
| 2-3 | 1-4 | 1-3 | 2-3 | 2-4 |
| 2-4 | 1-3 | 1-4 | 2-4 | 2-3 |
